# Supplementary material
Source: PubMed Central journal article supplement (PMC3695824)

**A**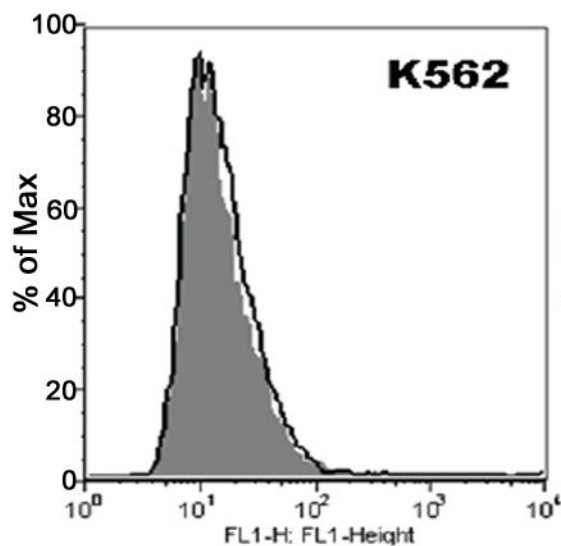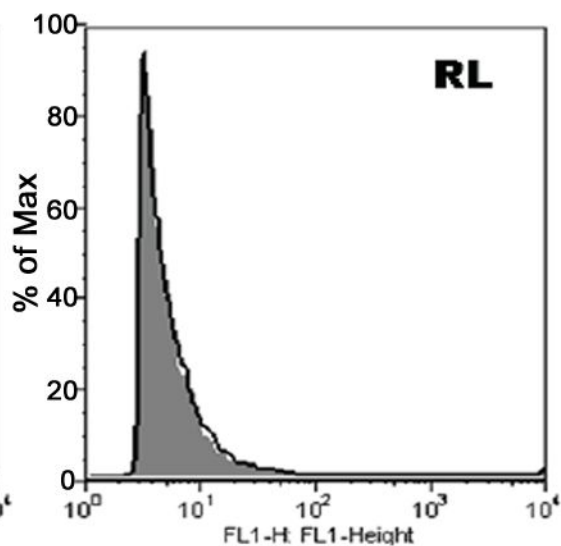**B**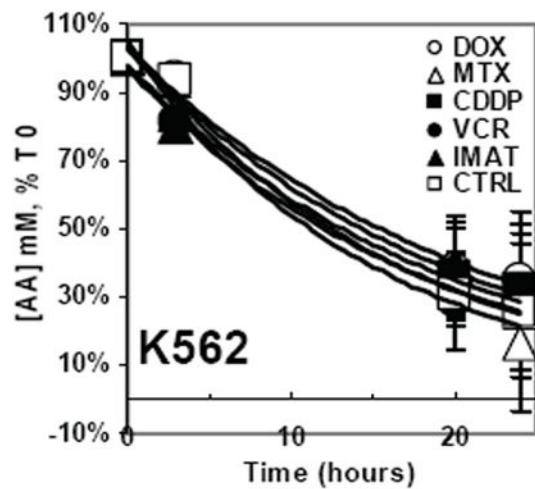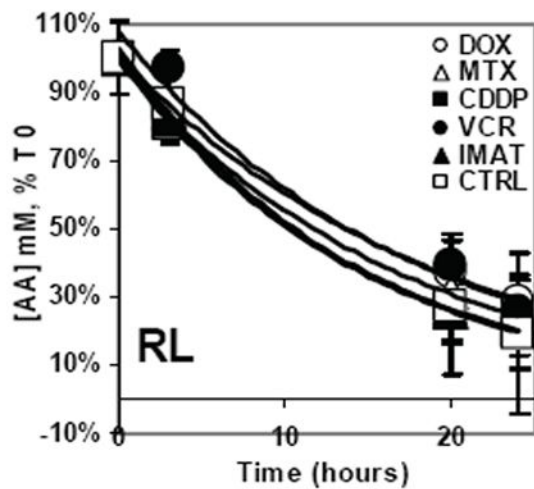

Supplement: NIHMS64385-supplement-Supplement_Figure_1.pdf [file NIHMS64385-supplement-Supplement_Figure_1.pdf]
